# Supplementary material for: Hydrogen plasma-treated MoSe2 nanosheets enhance the efficiency and stability of organic photovoltaics
Source: Royal Society of Chemistry journal article supplement (doi:10.1039/c9nr06611j), 2019-01-01
Supplement: c9nr06611j1.pdf [file c9nr06611j1.pdf]

Electronic Supplemental Information for

## Hydrogen Plasma–Treated MoSe<sub>2</sub> Nanosheets Enhance the Efficiency and Stability of Organic Photovoltaics

Hao-Cheng Wang<sup>a</sup>, Yu-Che Lin<sup>a</sup>, Chung-Hao Chen<sup>a</sup>, Chi-Hsien Huang<sup>b</sup>, Bin Chang<sup>a</sup>, Yi-Ling Liu<sup>a</sup>, Hao-Wen Cheng<sup>a</sup>, Cheng-Si Tsao<sup>c,d</sup>, Kung-Hwa Wei<sup>a,e\*</sup>

---

<sup>a</sup>Department of Materials Science and Engineering, National Chiao Tung University, Hsinchu 30010, Taiwan.

<sup>b</sup>Department of Materials Engineering, Ming Chi University of Technology, 24301 New Taipei City, Taiwan.

<sup>c</sup>Department of Materials Science and Engineering, National Taiwan University, Taipei 10617, Taiwan.

<sup>d</sup>Institute of Nuclear Energy Research, Taoyuan 32546, Taiwan

<sup>e</sup>Center for Emergent Functional Matter Science, National Chiao Tung University, Hsinchu 30010, Taiwan

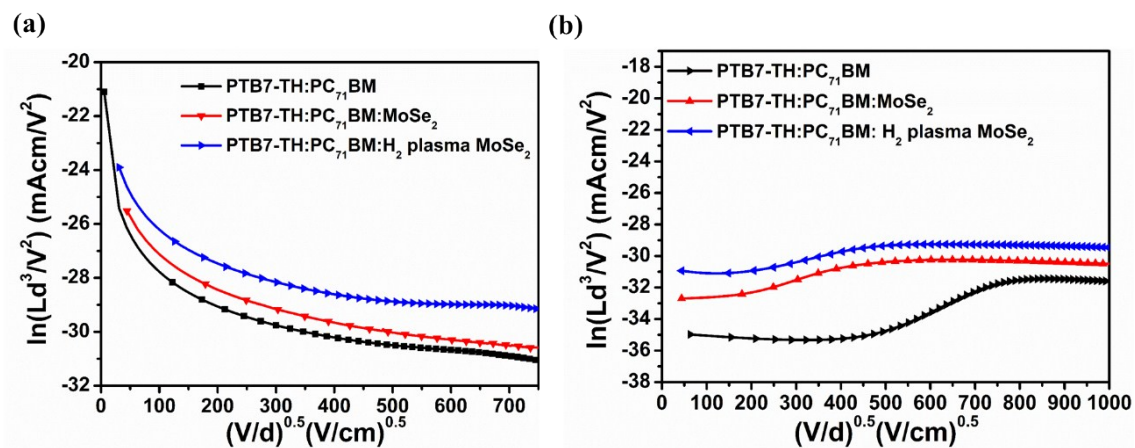

Fig. S1.  $J-V^2$  characteristics of devices, allowing calculations of the (a) hole and (b) electron mobilities using the Mott–Gurney equation.

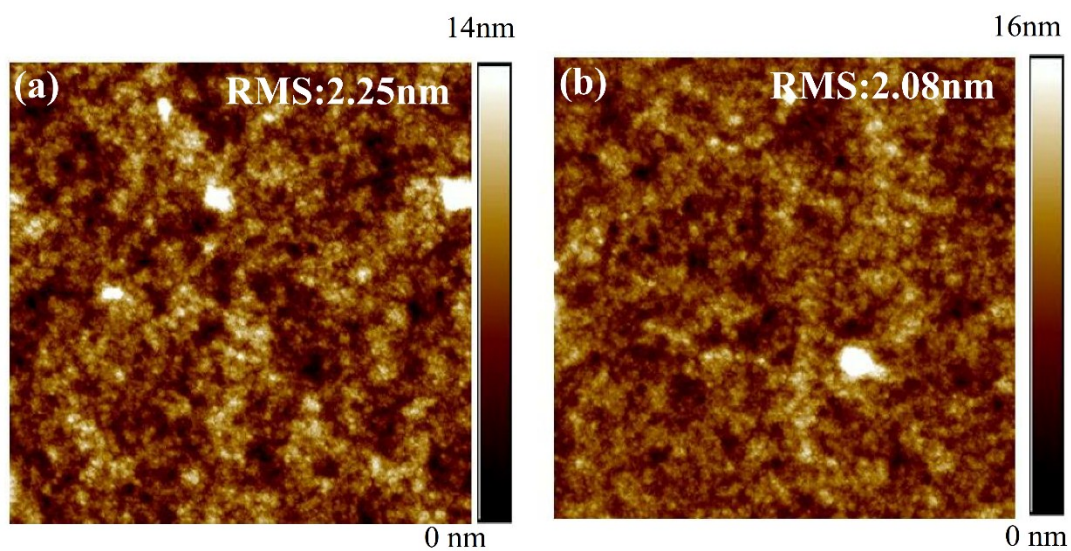

Fig. S2. AFM topographic images ( $5 \times 5 \mu\text{m}$ ) of blend films: (a) PTB7-TH:PC<sub>71</sub>BM:10%MoSe<sub>2</sub>, (b) PTB7-TH:PC<sub>71</sub>BM:20%MoSe<sub>2</sub>.

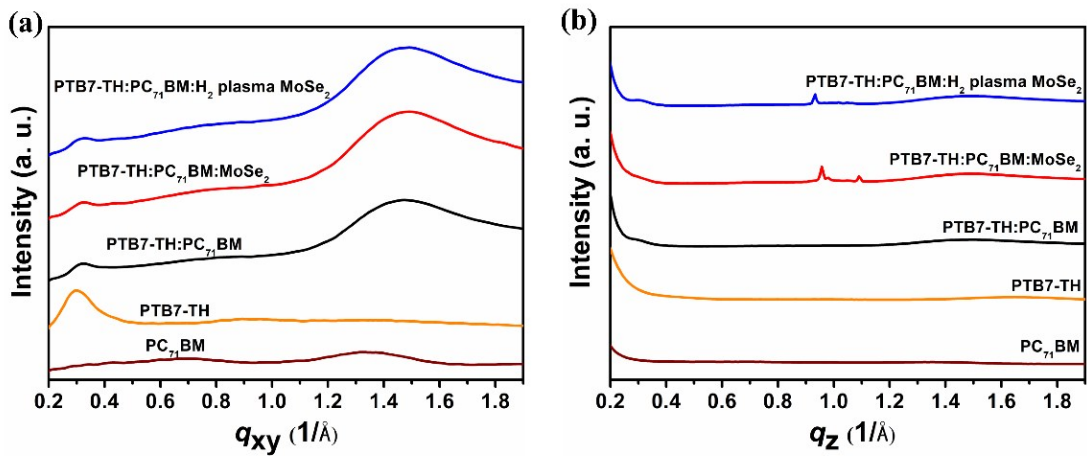

Fig. S3. Corresponding 1D GIWAXS profiles reduced from the (a) in-plane and (b) out-plane directions.

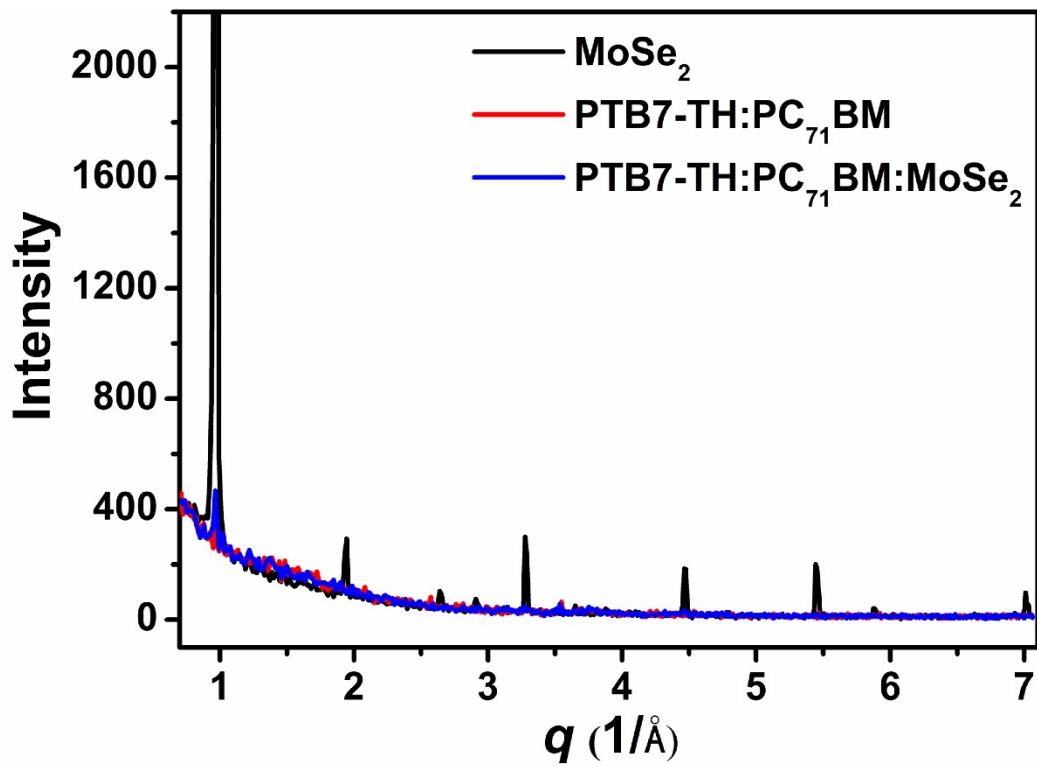

Fig. S4. Powder X-ray diffraction pattern of the films.

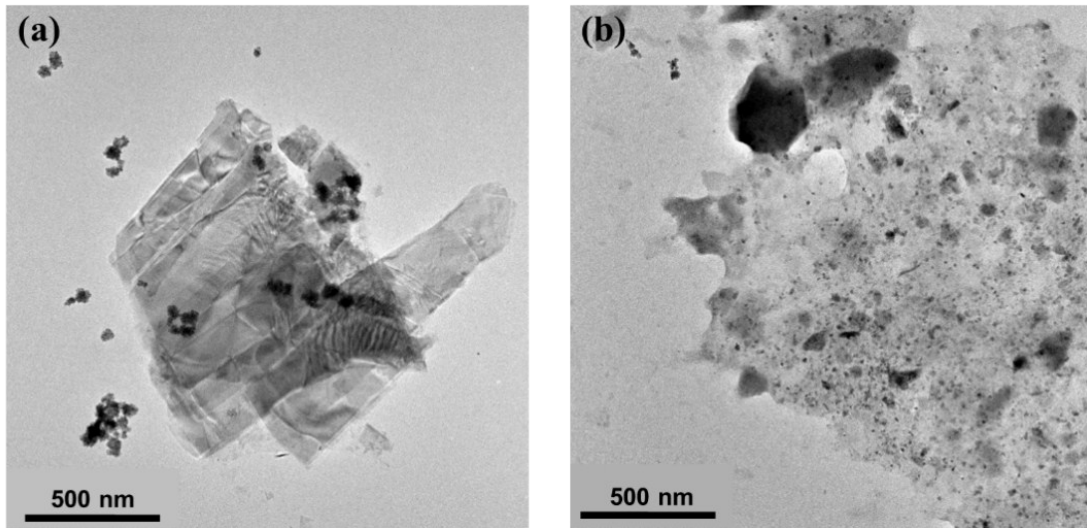

Fig. S5. TEM images of active layers incorporating (a) MoSe<sub>2</sub> and (b) hydrogen plasma-treated MoSe<sub>2</sub>.

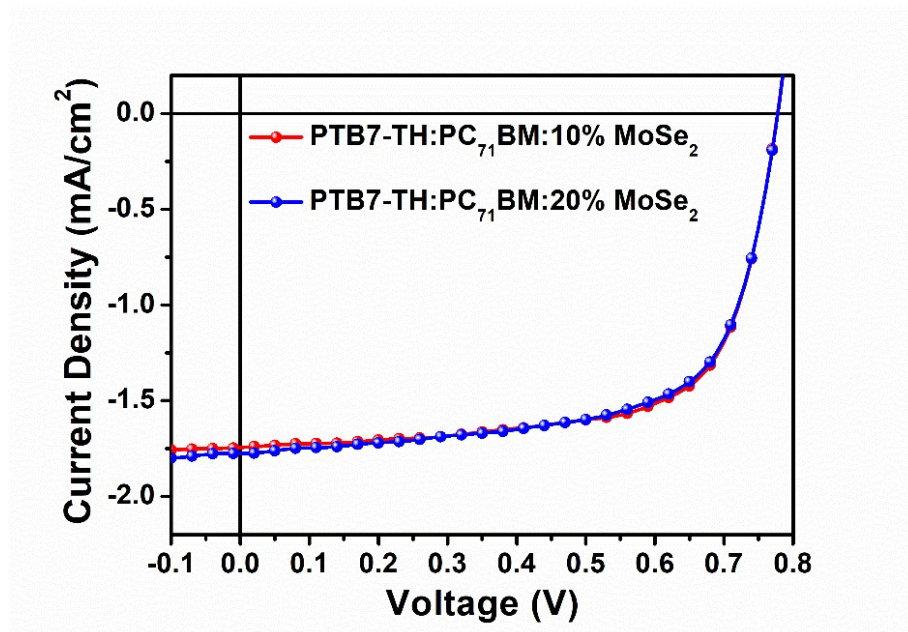

Fig. S6. J-V characteristics incorporating MoSe<sub>2</sub> prepared with different concentration.

**Table S1 Different concentration of ternary blends devices' photovoltaic performances.**

| Active layer <sup>a</sup>                            | $V_{oc}(V)$ | $J_{sc}(mA\ cm^{-2})$ | FF(%)      | PCE <sub>max</sub> (%) |
|------------------------------------------------------|-------------|-----------------------|------------|------------------------|
| PTB7-TH:PC <sub>71</sub> BM:10% MoSe <sub>2</sub>    | 0.78 ± 0.01 | 17.23 ± 0.2           | 0.7 ± 0.2  | 9.32                   |
| PTB7-TH:TH:PC <sub>71</sub> BM:20% MoSe <sub>2</sub> | 0.78 ± 0.01 | 17.6 ± 0.3            | 0.67 ± 0.3 | 9.26                   |

a) Weight ratio of D:A = 1:1.5    Twenty devices were fabricated.

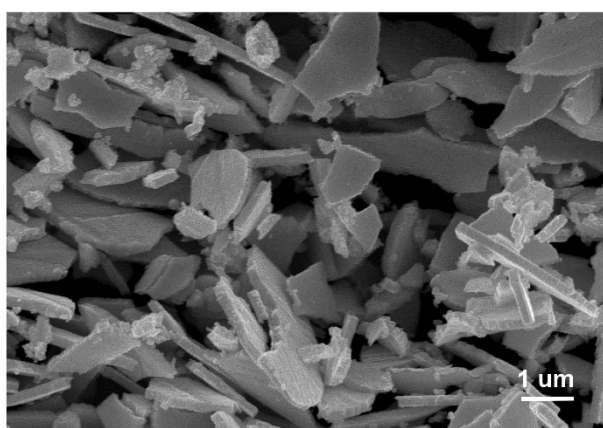

**Fig. S7. SEM image of MoSe<sub>2</sub>.**

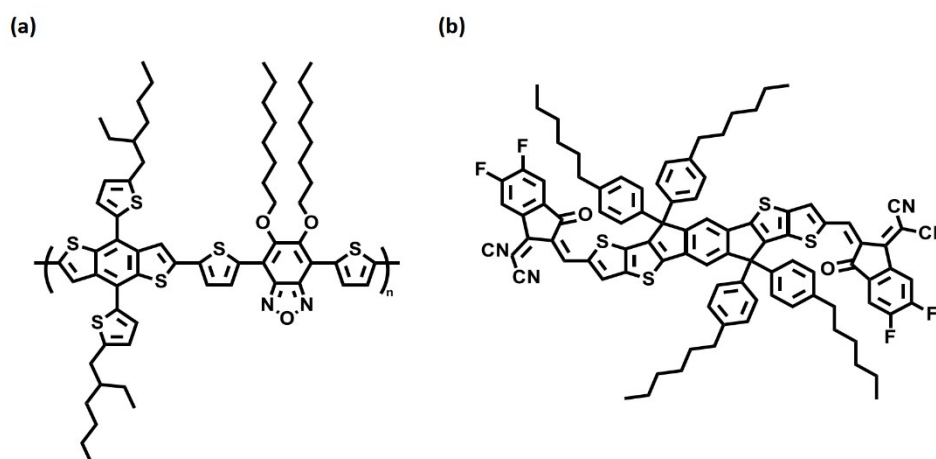

**Fig. S8. Schematic representation of the chemical structures of (a) PBDTTBO, and (b) IT-4F.**
